# Supplementary material for: Electronic structure, magnetoresistance and spin filtering in graphene|2 monolayer-CrI33|graphene van der Waals magnetic tunnel junctions
Source: Royal Society of Chemistry journal article supplement (doi:10.1039/d2ra02988j), 2022-01-01
Supplement: d2ra02988j1.pdf [file d2ra02988j1.pdf]

## Supplementary Material

### Electronic Structure, Magnetoresistance and Spin Filtering in Gr|2ML-CrI<sub>3</sub>|Gr van der Waals Magnetic Tunnel Junctions

Yibin Zhang,<sup>a</sup> Jie Liu,<sup>a,†</sup> Xuan Shi,<sup>b,c</sup> Renhao Deng,<sup>a</sup> Huan Tang,<sup>a</sup> Hong Chen,<sup>a</sup> and Hongkuan Yuan,<sup>a,†\*</sup>

<sup>a</sup> School of Physical Science and Technology, Southwest University, Chongqing, 400715, China

<sup>b</sup> School of Mechanical Engineering, Shaanxi University of Technology, Shaanxi, 723001, China

<sup>c</sup> Shaanxi Key Laboratory of Industrial Automation, Shaanxi University of Technology, Shaanxi, 723001, China

) Equal contribution

\*) Corresponding Author: [yhk10@swu.edu.cn](mailto:yhk10@swu.edu.cn) (Hongkuan Yuan), Tel.: +86-023-68252355

#### Contents:

**FIG. S1** The spin-polarized band structure and the density of state (DOS) of the monolayer CrI<sub>3</sub> obtained with PBE+U calculations. The blue and red curves denote the spin-up and spin-down bands (left panel), respectively; blue and green lines denote the Cr and I atoms (right panel), respectively.

**FIG. S2** The band structure of the graphene monolayer obtained with PBE+U calculations.

**FIG. S3.** (a) Spin-up density difference and (b) spin-down density difference  $\rho = \rho_{\text{(Heter)}} - \rho_{\text{(CrI}_3\text{)}} - \rho_{\text{(Gr)}}$  of Gr|2ML-CrI<sub>3</sub>|Gr heterostructure from side-view (Isosurface value: 0.0015 e/Å<sup>3</sup>). Green and blue colors denote the accumulation and depletion of density regions, respectively.

**FIG. S4.** Band structures of Gr|2ML-CrI<sub>3</sub>(AB')|Gr heterostructure with inter-layer ferromagnetic (FM) ordering between CrI<sub>3</sub> layers.

**FIG. S5.** Band structures of Gr|2ML-CrI<sub>3</sub>(AB')|Gr heterostructure with inter-layer antiferromagnetic (AFM) ordering between CrI<sub>3</sub> layers.

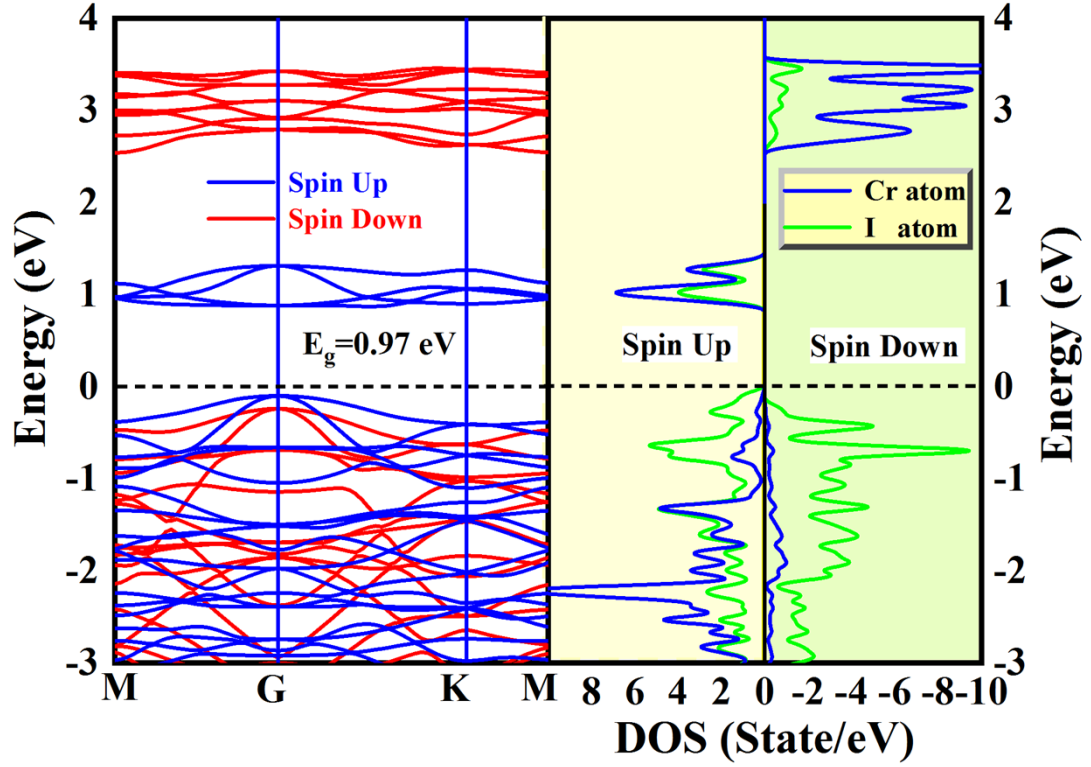

**FIG. S1** The spin-polarized band structure and the density of state (DOS) of the monolayer  $\text{CrI}_3$  obtained with PBE+U calculations. The blue and red curves denote the spin-up and spin-down bands (left panel), respectively; blue and green lines denote the Cr and I atoms (right panel), respectively.

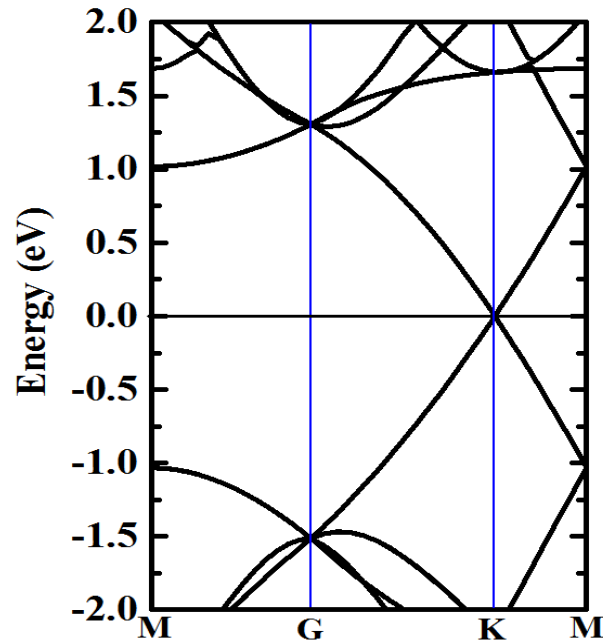

**FIG. S2** The band structure of the graphene monolayer obtained with PBE+U calculations.

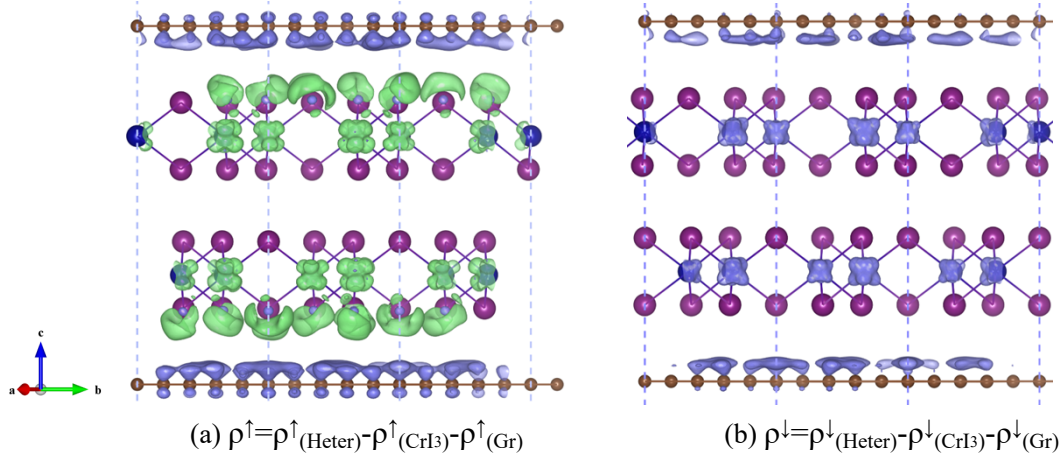

**FIG. S3.** (a) Spin-up density difference and (b) spin-down density difference  $\rho = \rho_{\text{(Heter)}} - \rho_{\text{(CrI}_3\text{)}} - \rho_{\text{(Gr)}}$  of Gr[2ML-CrI<sub>3</sub>]Gr heterostructure from side-view (Isosurface value: 0.0015 e/Å<sup>3</sup>). Green and blue colors denote the accumulation and depletion of density regions, respectively.

Note:

- (i) The charge transferred from the spin-up states is more than that from the spin-down states for Gr layers, resulting in the negative magnetic moment on C atoms; (ii) all the charges transferred from Gr layers are filled in the spin-up states of CrI<sub>3</sub> layers, indicating that the band gap and thus the spin-dependent tunneling barrier height will be changed to influence the transport properties; (iii) charge transfers from the spin-down states (blue colors in Fig.S3b) to the spin-up states in Cr atoms (green colors in Fig.S3a) will enhance the local magnetic moment of Cr atoms.

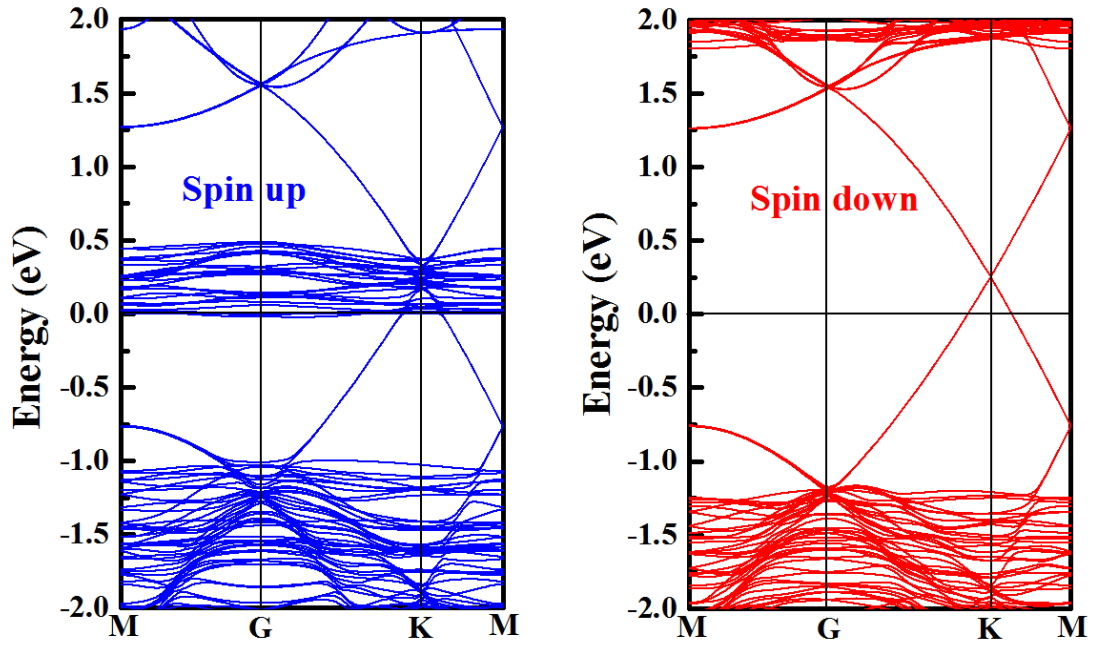

FIG. S4. Band structures of Gr|2ML-CrI<sub>3</sub>(AB')|Gr heterostructure with inter-layer ferromagnetic (FM) ordering between CrI<sub>3</sub> layers.

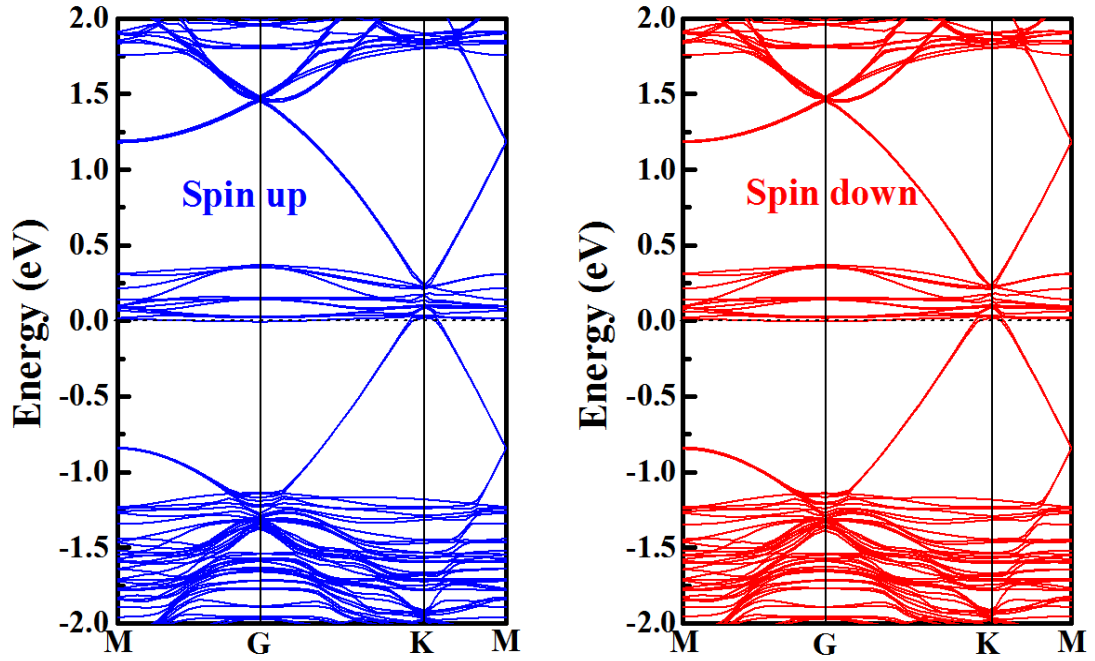

FIG. S5. Band structures of Gr|2ML-CrI<sub>3</sub>(AB')|Gr heterostructure with inter-layer antiferromagnetic (AFM) ordering between CrI<sub>3</sub> layers.
